# Supplementary material
Source: Springer Nature journal article supplement (https://www.springermedizin.de/resource/supplementary/13618_2012_45_MOESM3_ESM.pdf/9681036)

**(a) Glucose**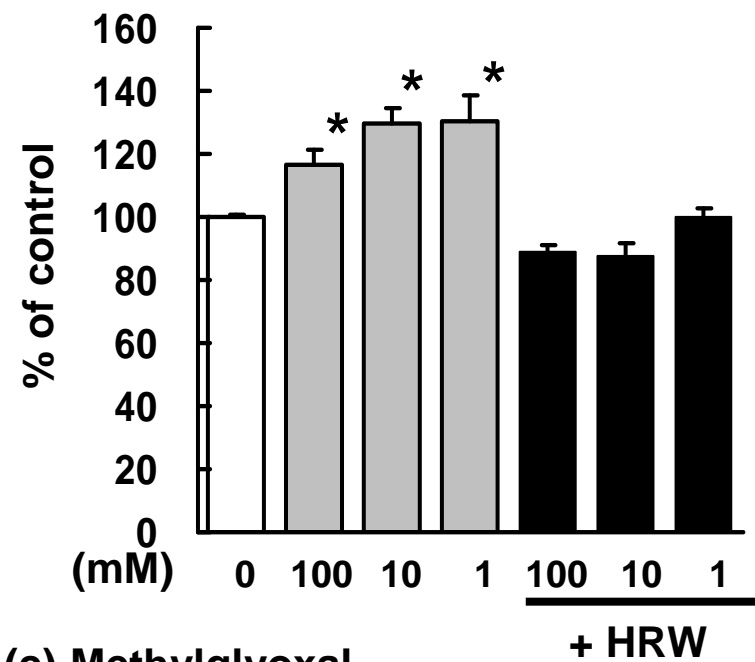**(b) Glyoxal**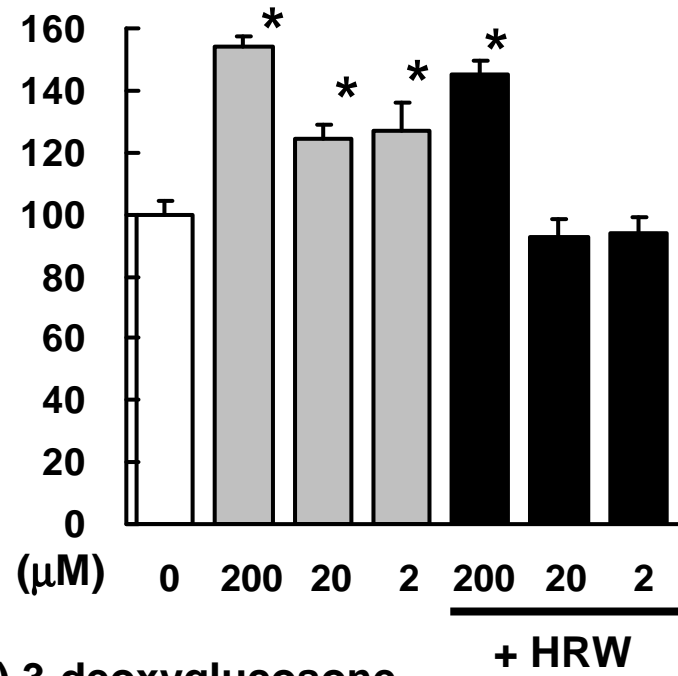**(c) Methylglyoxal**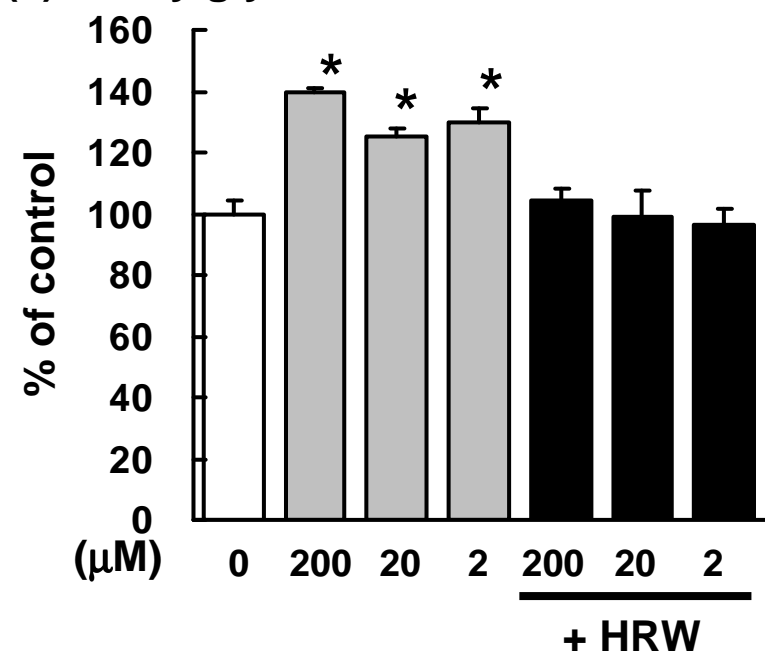**(d) 3-deoxyglucosone**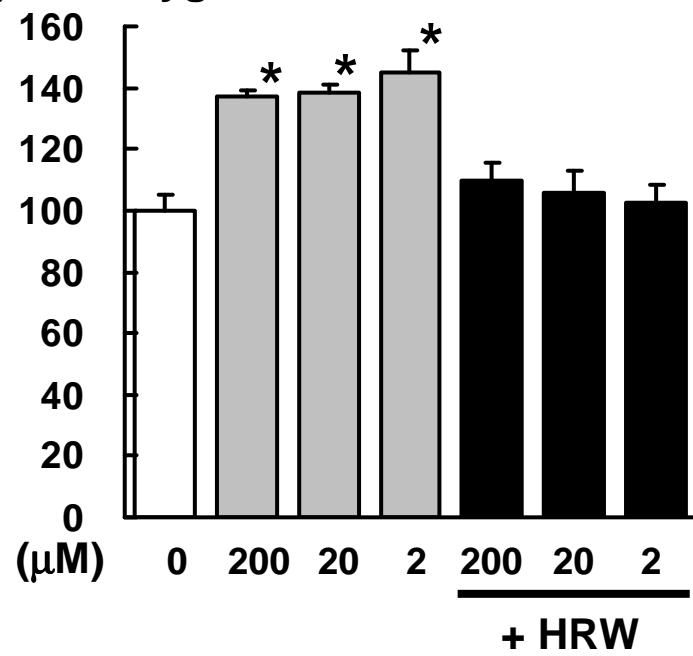

Supplement: MOESM3 [file 9681036]
